# Supplementary material for: Regulation of protein-coding gene and long noncoding RNA pairs in liver of conventional and germ-free mice following oral PBDE exposure
Source: PubMed Central journal article supplement (PMC6070246; doi:10.1371/journal.pone.0201387), 2018-08-01
Supplement: pone.0201387.s020.pdf [file pone.0201387.s020.pdf]

## Supplemental Materials

### **Title: Gut microbiome modifies the PBDE-mediated coordinate regulation of protein-coding genes and long non-coding RNAs in livers of conventional and germ-free mice**

Cindy Yanfei Li and Julia Yue Cui\*

Department of Environmental and Occupational Health Sciences, University of Washington, Seattle, WA 98105

**Running title:** Regulation of hepatic transcriptome by gut microbiome and PBDEs

\* Corresponding author  
Email: [juliacui@uw.edu](mailto:juliacui@uw.edu) (J.Y.C)

## II. Supplemental Tables

**Supplemental Table 1.** Mapping statistics of RNA-Seq.

| <b>Sample</b> | <b>Total reads</b> | <b>reads mapped</b> | <b>% mapped</b> |
|---------------|--------------------|---------------------|-----------------|
| CV_CO1        | 127166234          | 114920125           | 90.37%          |
| CV_CO2        | 72155698           | 52298449            | 72.48%          |
| CV_CO3        | 65480436           | 55736947            | 85.12%          |
| CV_BDE47_1    | 115222113          | 91751368            | 79.63%          |
| CV_BDE47_2    | 65093299           | 56155989            | 86.27%          |
| CV_BDE47_3    | 48123870           | 41131471            | 85.47%          |
| CV_BDE99_1    | 105371498          | 97936933            | 92.94%          |
| CV_BDE99_2    | 46057295           | 42014130            | 91.22%          |
| GF_CO1        | 92574095           | 86584551            | 93.53%          |
| GF_CO2        | 84704938           | 53528596            | 63.19%          |
| GF_CO3        | 47418827           | 43114075            | 90.92%          |
| GF_BDE47_1    | 82417373           | 76999864            | 93.43%          |
| GF_BDE47_2    | 38614284           | 35522885            | 91.99%          |
| GF_BDE47_3    | 49942704           | 38686913            | 77.46%          |
| GF_BDE99_1    | 48804600           | 44545654            | 91.27%          |
| GF_BDE99_2    | 50005307           | 46728929            | 93.45%          |
| GF_BDE99_3    | 44559087           | 41316843            | 92.72%          |
