# Supplementary material for: Regulation of protein-coding gene and long noncoding RNA pairs in liver of conventional and germ-free mice following oral PBDE exposure
Source: PubMed Central journal article supplement (PMC6070246; doi:10.1371/journal.pone.0201387), 2018-08-01
Supplement: pone.0201387.s021.pdf [file pone.0201387.s021.pdf]

**Supplemental Table 2.** Top 15 networks for PCGs that were differentially regulated by PBDEs in livers of CV and GF mice compared to corn oil-treated control group of the same enterotype of mice. The network in red color was shown in Supplemental Figures.

**CV\_CO vs CV\_BDE-47:**

|    | <b>Top Networks</b>                                                                                                     | <b>Focus Molecules</b> |
|----|-------------------------------------------------------------------------------------------------------------------------|------------------------|
| 1  | RNA Post-Transcriptional Modification, Developmental Disorder, Hereditary Disorder                                      | 34                     |
| 2  | Cellular Development, Cellular Growth and Proliferation, Cell Cycle                                                     | 32                     |
| 3  | Cancer, Gastrointestinal Disease, Organismal Injury and Abnormalities                                                   | 30                     |
| 4  | Behavior, Nervous System Development and Function, Antimicrobial Response                                               | 27                     |
| 5  | Cancer, Organismal Injury and Abnormalities, Renal and Urological Disease                                               | 27                     |
| 6  | Cell Cycle, Gene Expression, Cellular Growth and Proliferation                                                          | 26                     |
| 7  | Cancer, Cellular Movement, Organismal Injury and Abnormalities                                                          | 26                     |
| 8  | Lipid Metabolism, Small Molecule Biochemistry, Endocrine System Development and Function                                | 25                     |
| 9  | Dermatological Diseases and Conditions, Organismal Injury and Abnormalities, DNA Replication, Recombination, and Repair | 24                     |
| 10 | Carbohydrate Metabolism, Molecular Transport, Cell-To-Cell Signaling and Interaction                                    | 24                     |
| 11 | Immunological Disease, Antimicrobial Response, Inflammatory Response                                                    | 24                     |
| 12 | RNA Damage and Repair, Respiratory System Development and Function, Cancer                                              | 23                     |
| 13 | Carbohydrate Metabolism, Cell Morphology, Cellular Assembly and Organization                                            | 23                     |
| 14 | Lipid Metabolism, Small Molecule Biochemistry, Drug Metabolism                                                          | 22                     |
| 15 | Cell Cycle, Cellular Assembly and Organization, DNA Replication, Recombination, and Repair                              | 21                     |

**CV\_CO vs CV\_BDE-99:**

|   | <b>Top Networks</b>                                                                           | <b>Focus Molecules</b> |
|---|-----------------------------------------------------------------------------------------------|------------------------|
| 1 | Lipid Metabolism, Small Molecule Biochemistry, Molecular Transport                            | 28                     |
| 2 | Behavior, Nervous System Development and Function, Gene Expression                            | 26                     |
| 3 | Drug Metabolism, Protein Synthesis, Glutathione Depletion In Liver                            | 26                     |
| 4 | RNA Post-Transcriptional Modification, Cell Cycle, Connective Tissue Development and Function | 26                     |
| 5 | Endocrine System Disorders, Gastrointestinal Disease, Immunological Disease                   | 26                     |
| 6 | Lipid Metabolism, Small Molecule Biochemistry, Vitamin and Mineral Metabolism                 | 25                     |

|    |                                                                                  |    |
|----|----------------------------------------------------------------------------------|----|
| 7  | Gene Expression, Lipid Metabolism, Molecular Transport                           | 24 |
| 8  | Carbohydrate Metabolism, Cellular Development, Cellular Growth and Proliferation | 24 |
| 9  | Cancer, Connective Tissue Disorders, Endocrine System Disorders                  | 23 |
| 10 | Endocrine System Disorders, Gastrointestinal Disease, Immunological Disease      | 22 |
| 11 | Cardiovascular System Development and Function, Cardiovascular Disease, Cancer   | 22 |
| 12 | Cancer, Connective Tissue Disorders, Organismal Injury and Abnormalities         | 21 |
| 13 | Lipid Metabolism, Small Molecule Biochemistry, Vitamin and Mineral Metabolism    | 20 |
| 14 | Immunological Disease, Endocrine System Disorders, Gastrointestinal Disease      | 20 |
| 15 | Cellular Compromise, Cellular Development, Embryonic Development                 | 20 |

#### GF\_CO vs GF\_BDE-47:

|    | Top Networks                                                                                                       | Focus Molecules |
|----|--------------------------------------------------------------------------------------------------------------------|-----------------|
| 1  | Drug Metabolism, Glutathione Depletion In Liver, Lipid Metabolism                                                  | 21              |
| 2  | Lipid Metabolism, Liver Cholestasis, Molecular Transport                                                           | 21              |
| 3  | Drug Metabolism, Small Molecule Biochemistry, Cell-To-Cell Signaling and Interaction                               | 19              |
| 4  | Endocrine System Development and Function, Small Molecule Biochemistry, Drug Metabolism                            | 15              |
| 5  | Carbohydrate Metabolism, Digestive System Development and Function, Cardiovascular Disease                         | 14              |
| 6  | Cell-To-Cell Signaling and Interaction, Cell-mediated Immune Response, Cellular Movement                           | 14              |
| 7  | Organ Development, Reproductive System Development and Function, Developmental Disorder                            | 13              |
| 8  | Cellular Growth and Proliferation, Lymphoid Tissue Structure and Development, Cellular Development                 | 12              |
| 9  | Cell-To-Cell Signaling and Interaction, Molecular Transport, Small Molecule Biochemistry                           | 11              |
| 10 | Cell-To-Cell Signaling and Interaction, Nervous System Development and Function, Cellular Growth and Proliferation | 10              |
| 11 | Embryonic Development, Organismal Development, Tissue Development                                                  | 10              |
| 12 | Cell Cycle, Cellular Assembly and Organization, Cancer                                                             | 1               |

#### GF\_CO vs GF\_BDE-99:

|   | Top Networks                                                     | Focus Molecules |
|---|------------------------------------------------------------------|-----------------|
| 1 | Cancer, Organismal Injury and Abnormalities, Hereditary Disorder | 35              |
| 2 | Developmental Disorder, Hereditary Disorder, Metabolic Disease   | 35              |
